# Supplementary material for: A lightweight deep learning model for automatic segmentation and analysis of ophthalmic images
Source: PubMed Central journal article supplement (PMC9122907; doi:10.1038/s41598-022-12486-w), 2022-05-20
Supplement: 41598_2022_12486_MOESM3_ESM.pdf [file 41598_2022_12486_MOESM3_ESM.pdf]

## Supplementary information

### A lightweight deep learning model for automatic segmentation and analysis of ophthalmic images

#### Authors:

Parmanand Sharma,<sup>1,2,a,\*</sup> Takahiro Ninomiya,<sup>1\*</sup> Kazuko Omodaka,<sup>1,4</sup> Naoki Takahashi,<sup>1</sup> Takehiro Miya,<sup>1,4</sup> Noriko Himori,<sup>1,6</sup> Takayuki Okatani<sup>7</sup> and Toru Nakazawa<sup>1-5, a</sup>

#### Affiliations:

<sup>1</sup>Department of Ophthalmology, Tohoku University Graduate School of Medicine, Sendai, Japan

<sup>2</sup>Advanced Research Center for Innovations in Next-Generation Medicine, Tohoku University Graduate School of Medicine, Sendai, Japan

<sup>3</sup>Department of Retinal Disease Control, Tohoku University Graduate School of Medicine, Sendai, Japan

<sup>4</sup>Department of Ophthalmic Imaging and Information Analytics, Tohoku University Graduate School of Medicine, Sendai, Japan

<sup>5</sup>Department of Advanced Ophthalmic Medicine, Tohoku University Graduate School of Medicine, Sendai, Japan

<sup>6</sup>Department of Aging Vision Healthcare, Tohoku University Graduate School of Biomedical Engineering, Sendai, Japan

<sup>7</sup>Graduate School of Information Sciences, Tohoku University, Sendai, Japan

\* Co-first authorship

<sup>a</sup>Email address for correspondence: [sharma@oph.med.tohoku.ac.jp](mailto:sharma@oph.med.tohoku.ac.jp), and [ntoru@oph.med.tohoku.ac.jp](mailto:ntoru@oph.med.tohoku.ac.jp)

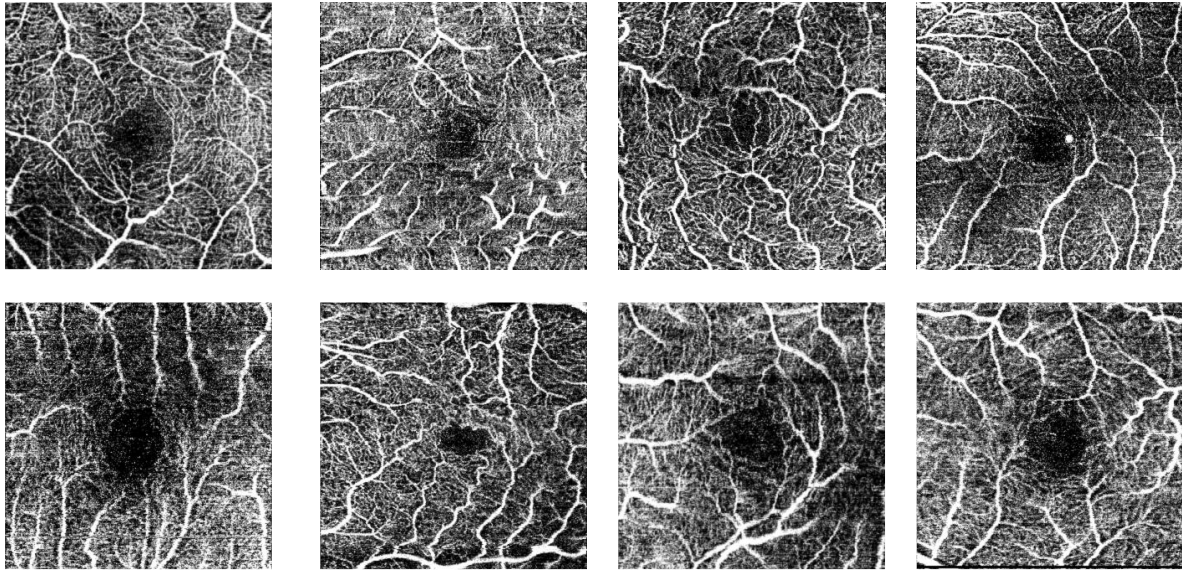

**Fig.S1** Some examples of noisy OCTA images ( $3 \times 3 \text{ mm}^2$ ) from the testing dataset of 145 images. This dataset is used to test the segmentation accuracy of all the models. The images in this dataset were never exposed to training and validation of the models.

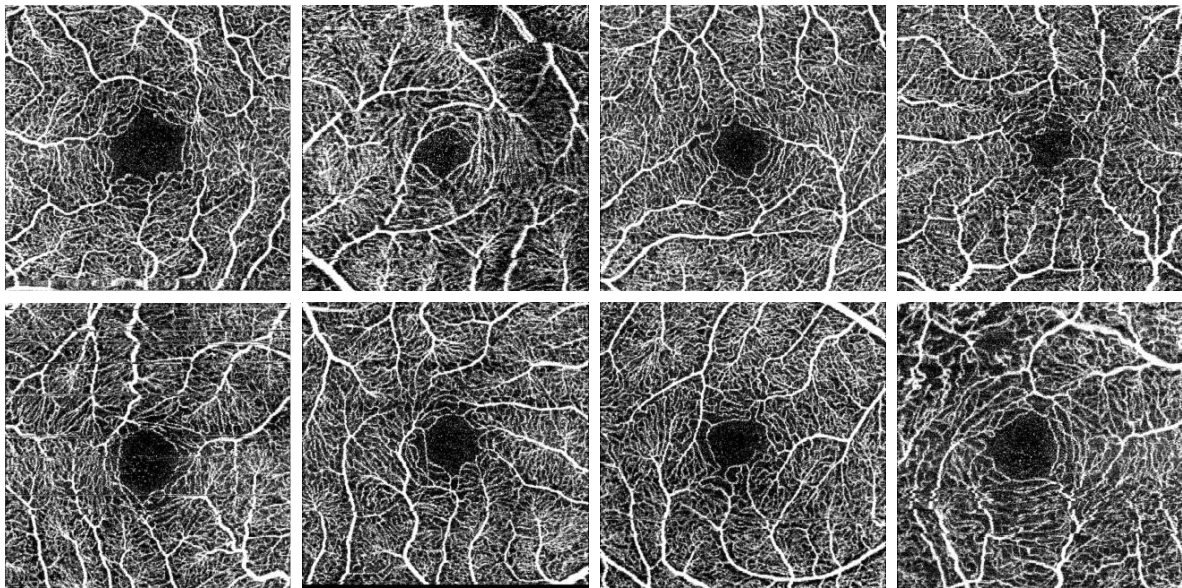

**Fig.S2** Some examples of visually clear OCTA images ( $3 \times 3 \text{ mm}^2$ ) with clear FAZ boundary in the testing dataset of 145 images.

Original OCTA image

Segmented with Unet\_AB

LWBNA\_Unet

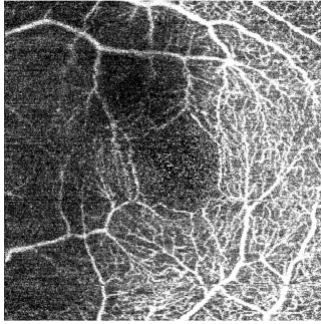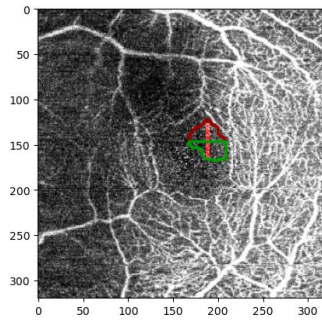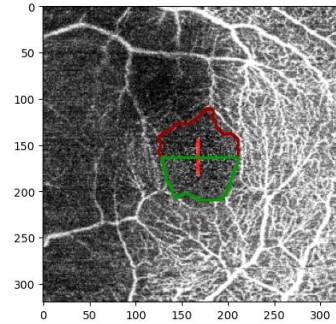

1

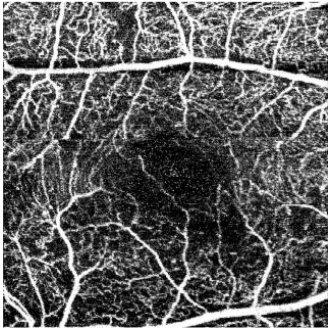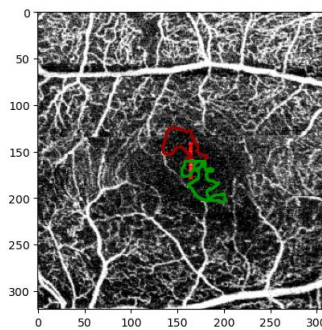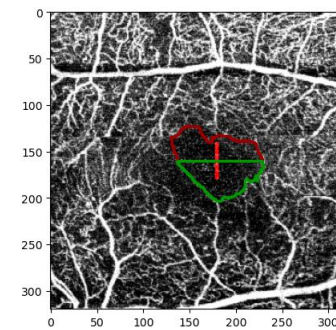

2

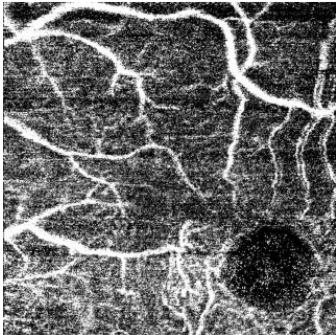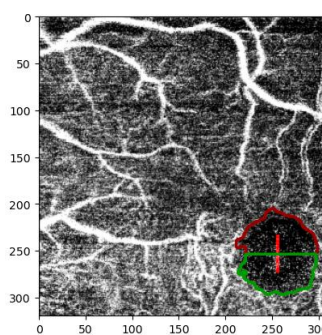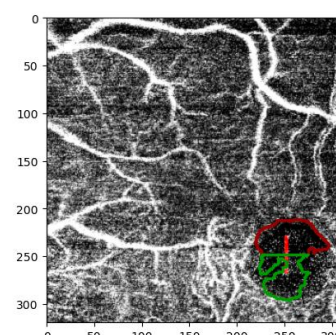

3

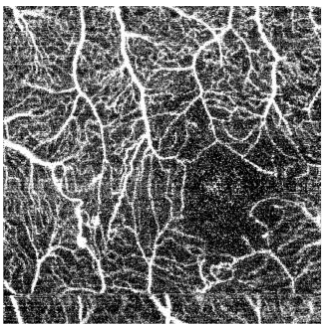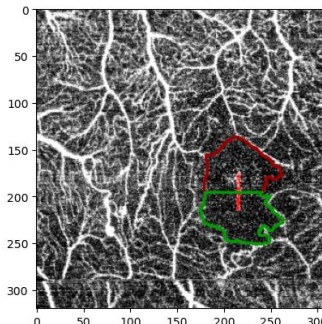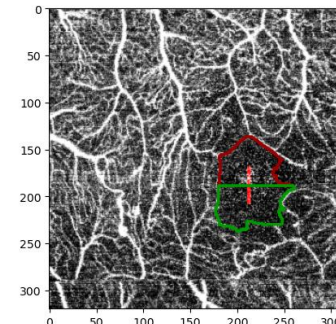

4

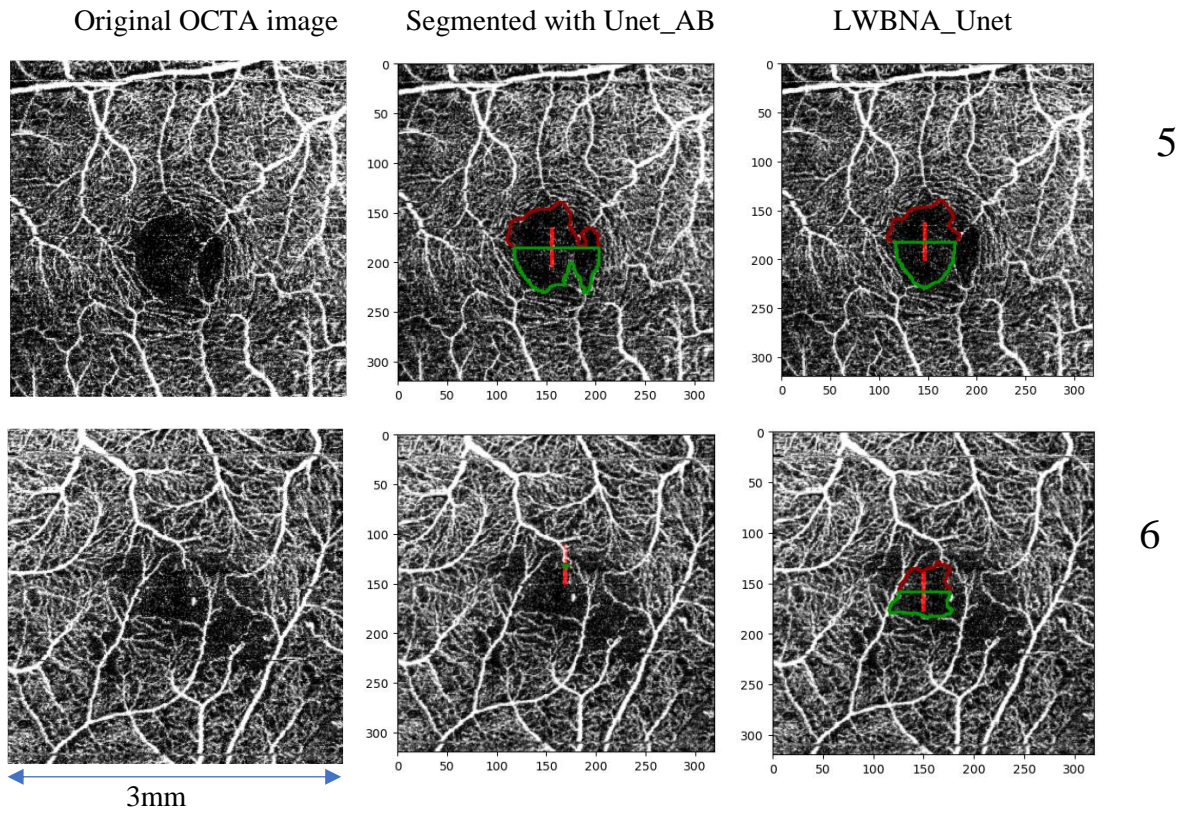

**Fig. S3** OCTA images ( $3 \times 3 \text{ mm}^2$ , and  $320 \times 320$  pixels) with their segmented FAZ by DL models Unet\_AB and LWBNA\_Unet. The number on the right side of each image corresponds to the data points (the most scattered) marked with blue circle in Fig. 5(b) of the main manuscript.

### Architecture of DeepLabV3+

Ref: Chen, L.-C et al., in *Computer Vision – ECCV 2018*. 833-851 (Springer International Publishing).

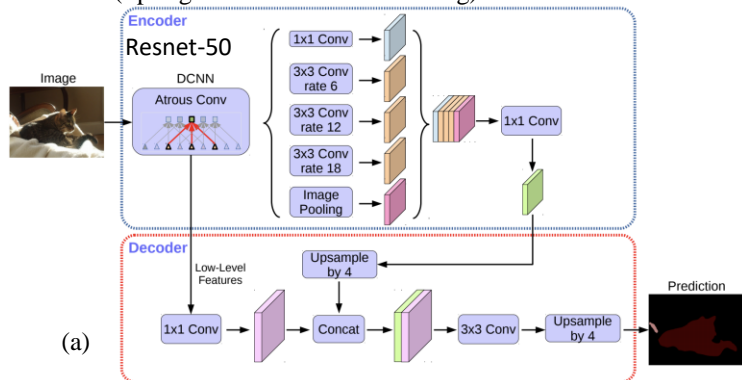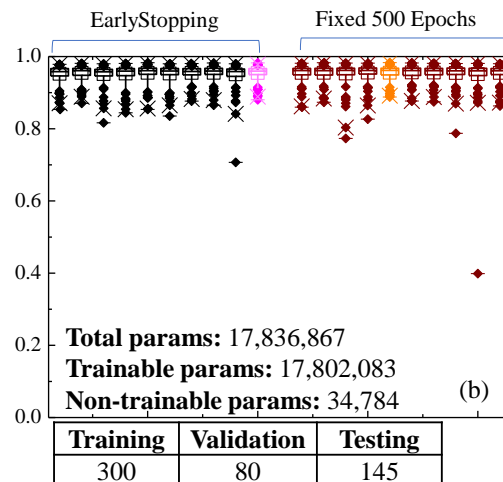

**Fig. S4** (a) Architecture of the DeepLabv3+ model used for the segmentation of FAZ in OCTA images. The encoder network Resnet-50 was used with the pretrained weights of imagenet dataset, (b) Boxplot showing spread in D for our OCTA testing dataset (segmentation of FAZ area) obtained from Deeplabv3+ model. Model was trained for 10 times using ‘callbacks’ function of tensorflow, and for fixed epochs of 500. The best trained model in each case is shown with the magenta and orange colors. Generalization of model for the testing dataset of 145 OCTA images is similar in both the cases, suggesting that the pretrained weights from imagenet are very effective as compared to training of the model from scratch.

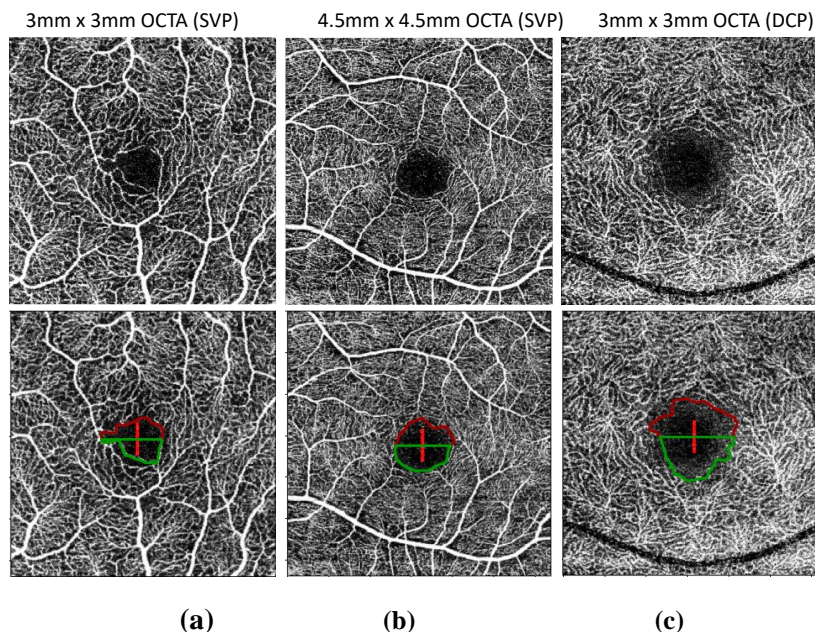

**Fig. S5** LWBNA\_Unet trained on (a) 3mm x 3mm, SVP OCTA images, can segment (b) 4.5 mm x 4.5 mm SVP OCTA images, and (c) 3mm x 3mm OCTA-DCP images. These results point towards the good generalization of model on different types of images.

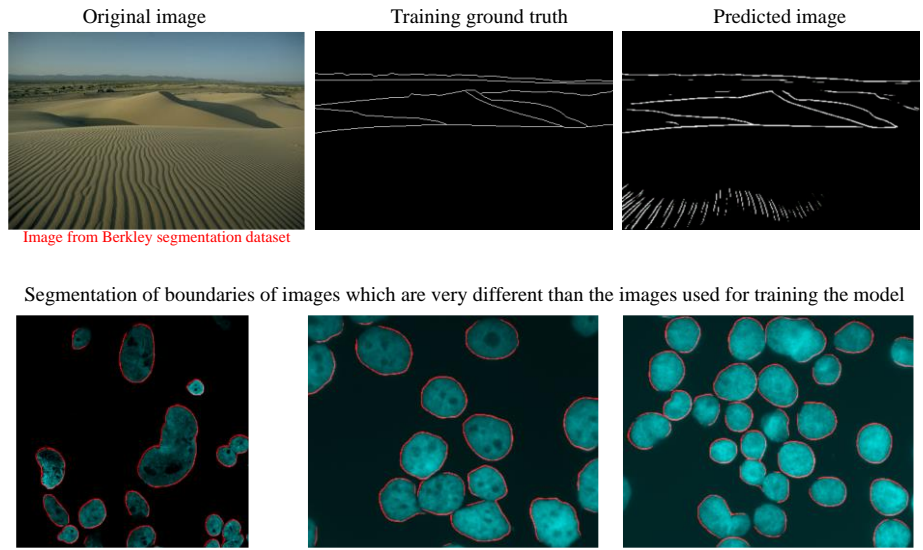

**Fig.S6** LWBNA\_Unet model trained for detecting object boundaries in general images (Berkley segmentation dataset: <https://www2.eecs.berkeley.edu/Research/Projects/CS/vision/bsds/>) can segment cell boundaries (red color, images were obtained from the freely available dataset). These results, again point towards the good generalization of our model for the segmentation of images, which are very different from the images used for the training of the model.

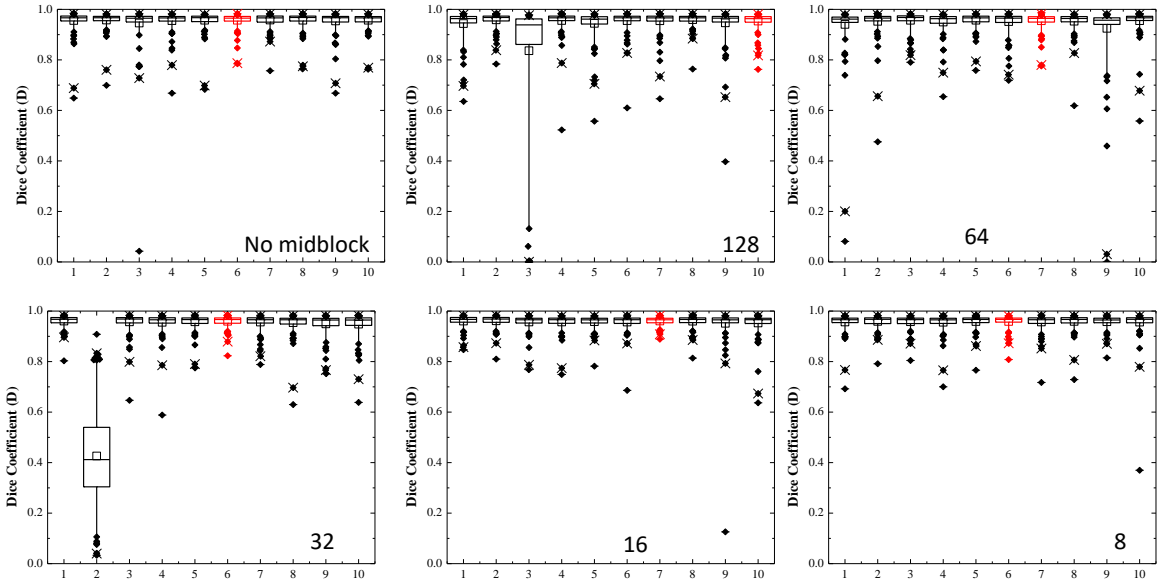

**Fig. S7** Box plot showing effect of channel narrowing with attention at the bottleneck of lightweight model (LWBNA\_Unet) developed in present study. The numbers on the x axis are the number of times the model is trained under same conditions. Red curve is the best among the 10 times training. The numbers in the bottom are the final number channels when reduced from 128. **Here the training of model was stopped early once the validation loss meet certain conditions.**

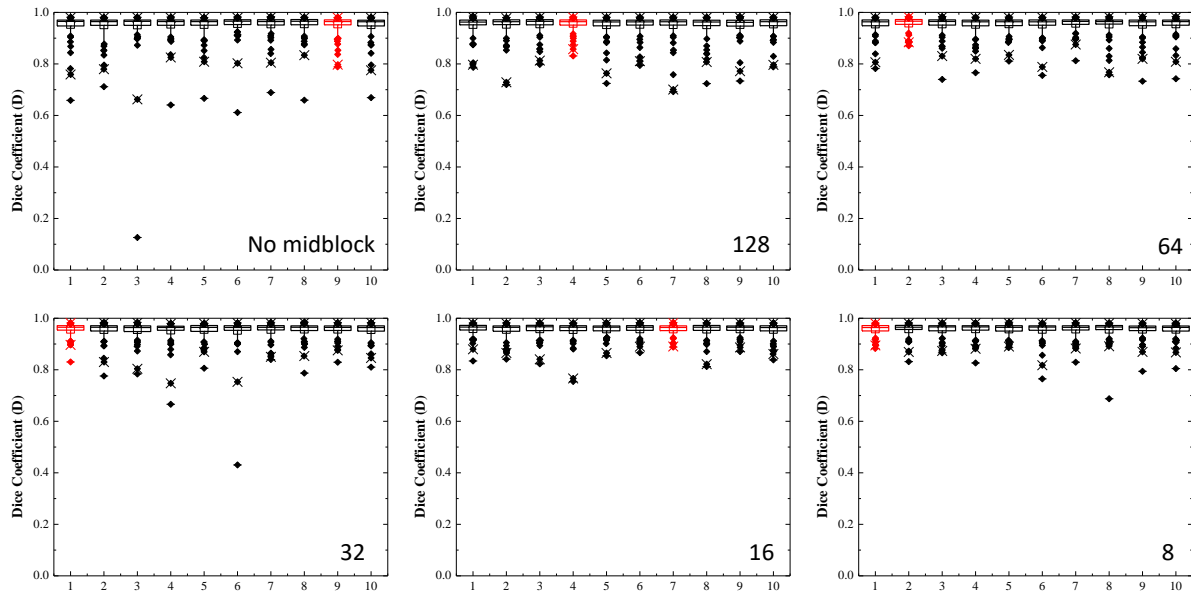

**Fig. S8** Box plot showing effect of channel narrowing with attention at the bottleneck of lightweight model (LWBNA\_Unet) developed in present study. The numbers on the x axis are the number of times the model is trained under same conditions. Red curve is the best among the 10 times training. The numbers in the bottom are the final number channels when reduced from 128. **Here the training of models was performed for a fixed number of epochs of 500.**

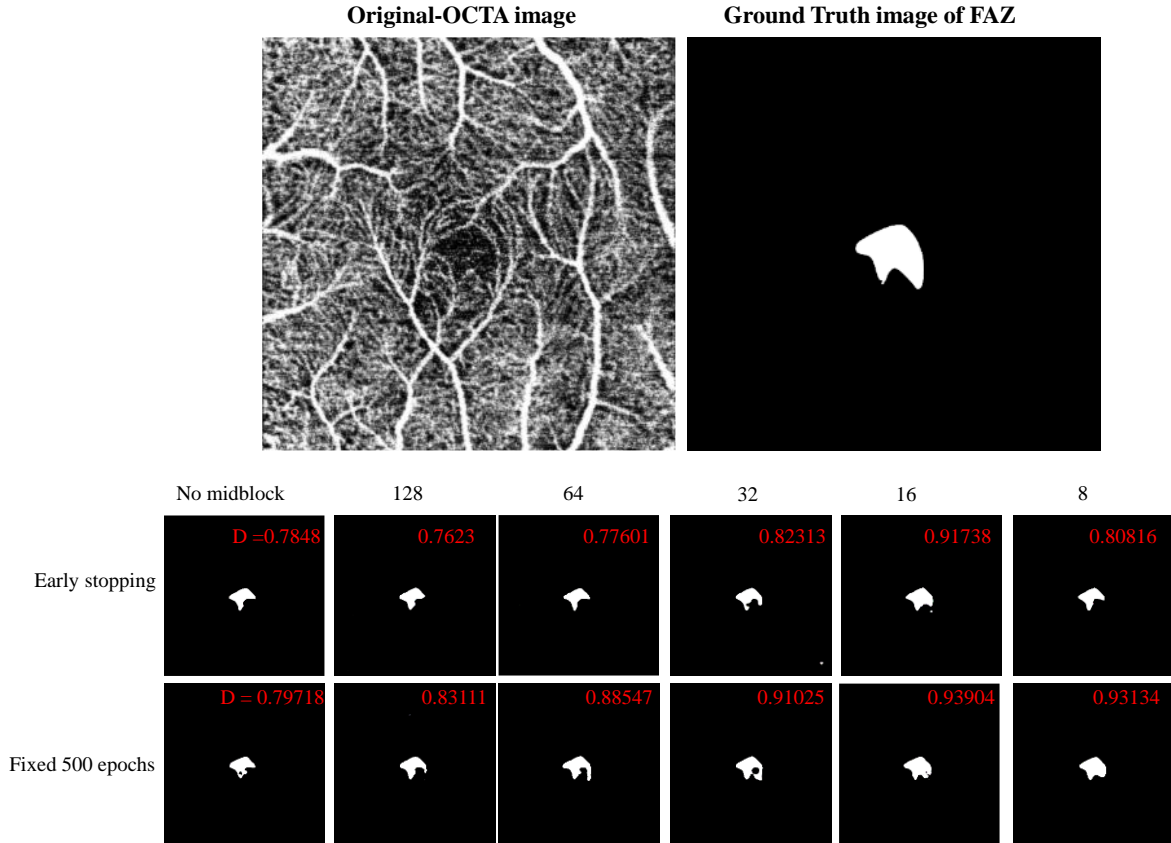

**Fig. S9** Effect of bottleneck narrowing with attention in lightweight model LWBNA\_Unet. The OCTA image ( $3 \times 3 \text{ mm}^2$ ) is same as in Fig. 3(b) of the main manuscript. Visually, the image quality is not so bad, but most of the models trained in present work produced low D repeatedly. From these results we can notice that the segmentation improves on reduction of number of channels at the bottleneck, and well consistent with the statistical analysis on 145 testing images. It is to be noted that the D obtained for reducing the channel is slightly lower than the one shown in Fig. 3(g), even though the image and training epoch are same, and model is selected as a best from the training for 10 times. Statistically, this has slightly lower spread for most of the outliers in the whole dataset as compared to the one shown in Fig. 3(a). For individual images there is always a possibility for minor changes from one training to another. This is basically due to reproducibility issues with all the deep learning models, as discussed in the section, “Reproducibility of lightweight DL model, and a comparison with other models” in the manuscript.



<https://www.nvidia.com/en-us/autonomous-machines/embedded-systems/jetson-xavier-nx/>

### Nvidia's Jetson Xavier NX 8 GB RAM

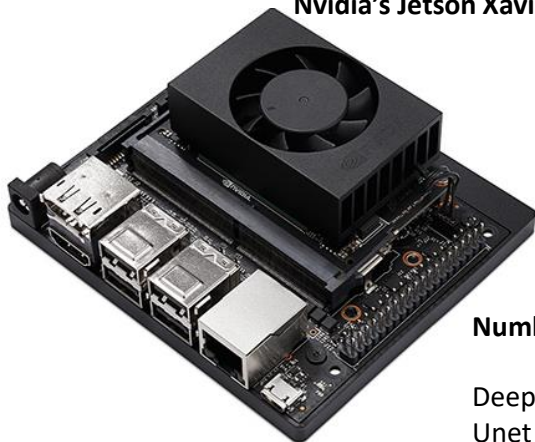

|                   |                                                                                       |
|-------------------|---------------------------------------------------------------------------------------|
| <b>GPU</b>        | NVIDIA Volta architecture with 384 NVIDIA CUDA <sup>®</sup> cores and 48 Tensor cores |
| <b>CPU</b>        | 6-core NVIDIA Carmel ARM <sup>®</sup> v8.2 64-bit CPU 6 MB L2 + 4 MB L3               |
| <b>Mechanical</b> | 103 mm x 90.5 mm x 34.66 mm                                                           |

|                   | <b>Number of model parameter:</b> | <b>Average FAZ segmentation time<br/>(frames per second (fps))</b> |
|-------------------|-----------------------------------|--------------------------------------------------------------------|
| DeepLabv3+:       | 17.84 million                     | 3.44                                                               |
| Unet :            | 28.34 million                     | 2.56                                                               |
| <b>Our model:</b> | <b>2.95 million</b>               | <b>2.75</b>                                                        |

**Fig.S10** We have tested the prediction time of FAZ segmentation in OCTA images (size -320 x 320x3 pixels) with Nvidia's Jetson Xavier NX, AI computer module running on Jetpack 4.6. Under the identical conditions, the average time of prediction for 145 OCTA images is ~ 2.75 fps, 2.56 fps and 3.44 fps for LWBNA\_Unet, Unet and Deeplabv3+, respectively. Our model, LWBNA\_Unet has advantage for loading/running multiple models at the same time due to very low memory (35 MB) of trained model. However, it is difficult to load and run 3 or more Unet models at the same time because of limitations in GPU memory.

## Summary of the lightweight model developed in the current study.

The command, 'model.summary()' from tensorflow-keras was used to print the model summary.

### Model: "LWBNA\_Unet"

| Layer (type)                                 | Output Shape          | Param # | Connected to                  |
|----------------------------------------------|-----------------------|---------|-------------------------------|
| input_7 (InputLayer)                         | [None, 320, 320, 3]   | 0       |                               |
| conv2d_144 (Conv2D)                          | (None, 320, 320, 128) | 3584    | input_7[0][0]                 |
| batch_normalization_108 (BatchNormalization) | (None, 320, 320, 128) | 512     | conv2d_144[0][0]              |
| activation_264 (Activation)                  | (None, 320, 320, 128) | 0       | batch_normalization_108[0][0] |

|                                                      |                       |        |                                              |
|------------------------------------------------------|-----------------------|--------|----------------------------------------------|
| conv2d_145 (Conv2D)                                  | (None, 320, 320, 128) | 147584 | activation_264[0][0]                         |
| batch_normalization_109 (BatchNormalization)         | (None, 320, 320, 128) | 512    | conv2d_145[0][0]                             |
| activation_265 (Activation)                          | (None, 320, 320, 128) | 0      | batch_normalization_109[0][0]                |
| global_average_pooling2d_78 (GlobalAveragePooling2D) | (None, 128)           | 0      | activation_265[0][0]                         |
| dense_78 (Dense)                                     | (None, 128)           | 16512  | global_average_pooling2d_78[0][0]            |
| activation_266 (Activation)                          | (None, 128)           | 0      | dense_78[0][0]                               |
| activation_267 (Activation)                          | (None, 128)           | 0      | activation_266[0][0]                         |
| multiply_78 (Multiply)                               | (None, 320, 320, 128) | 0      | activation_265[0][0]<br>activation_267[0][0] |
| max_pooling2d_24 (MaxPooling2D)                      | (None, 160, 160, 128) | 0      | multiply_78[0][0]                            |
| dropout_48 (Dropout)                                 | (None, 160, 160, 128) | 0      | max_pooling2d_24[0][0]                       |
| conv2d_146 (Conv2D)                                  | (None, 160, 160, 128) | 147584 | dropout_48[0][0]                             |
| batch_normalization_110 (BatchNormalization)         | (None, 160, 160, 128) | 512    | conv2d_146[0][0]                             |
| activation_268 (Activation)                          | (None, 160, 160, 128) | 0      | batch_normalization_110[0][0]                |
| conv2d_147 (Conv2D)                                  | (None, 160, 160, 128) | 147584 | activation_268[0][0]                         |
| batch_normalization_111 (BatchNormalization)         | (None, 160, 160, 128) | 512    | conv2d_147[0][0]                             |
| activation_269 (Activation)                          | (None, 160, 160, 128) | 0      | batch_normalization_111[0][0]                |
| global_average_pooling2d_79 (GlobalAveragePooling2D) | (None, 128)           | 0      | activation_269[0][0]                         |
| dense_79 (Dense)                                     | (None, 128)           | 16512  | global_average_pooling2d_79[0][0]            |
| activation_270 (Activation)                          | (None, 128)           | 0      | dense_79[0][0]                               |
| activation_271 (Activation)                          | (None, 128)           | 0      | activation_270[0][0]                         |
| multiply_79 (Multiply)                               | (None, 160, 160, 128) | 0      | activation_269[0][0]<br>activation_271[0][0] |
| max_pooling2d_25 (MaxPooling2D)                      | (None, 80, 80, 128)   | 0      | multiply_79[0][0]                            |
| dropout_49 (Dropout)                                 | (None, 80, 80, 128)   | 0      | max_pooling2d_25[0][0]                       |
| conv2d_148 (Conv2D)                                  | (None, 80, 80, 128)   | 147584 | dropout_49[0][0]                             |
| batch_normalization_112 (BatchNormalization)         | (None, 80, 80, 128)   | 512    | conv2d_148[0][0]                             |
| activation_272 (Activation)                          | (None, 80, 80, 128)   | 0      | batch_normalization_112[0][0]                |
| conv2d_149 (Conv2D)                                  | (None, 80, 80, 128)   | 147584 | activation_272[0][0]                         |
| batch_normalization_113 (BatchNormalization)         | (None, 80, 80, 128)   | 512    | conv2d_149[0][0]                             |
| activation_273 (Activation)                          | (None, 80, 80, 128)   | 0      | batch_normalization_113[0][0]                |
| global_average_pooling2d_80 (GlobalAveragePooling2D) | (None, 128)           | 0      | activation_273[0][0]                         |
| dense_80 (Dense)                                     | (None, 128)           | 16512  | global_average_pooling2d_80[0][0]            |
| activation_274 (Activation)                          | (None, 128)           | 0      | dense_80[0][0]                               |

|                                                      |                     |        |                                              |
|------------------------------------------------------|---------------------|--------|----------------------------------------------|
| activation_275 (Activation)                          | (None, 128)         | 0      | activation_274[0][0]                         |
| multiply_80 (Multiply)                               | (None, 80, 80, 128) | 0      | activation_273[0][0]<br>activation_275[0][0] |
| max_pooling2d_26 (MaxPooling2D)                      | (None, 40, 40, 128) | 0      | multiply_80[0][0]                            |
| dropout_50 (Dropout)                                 | (None, 40, 40, 128) | 0      | max_pooling2d_26[0][0]                       |
| conv2d_150 (Conv2D)                                  | (None, 40, 40, 128) | 147584 | dropout_50[0][0]                             |
| batch_normalization_114 (BatchNormalization)         | (None, 40, 40, 128) | 512    | conv2d_150[0][0]                             |
| activation_276 (Activation)                          | (None, 40, 40, 128) | 0      | batch_normalization_114[0][0]                |
| conv2d_151 (Conv2D)                                  | (None, 40, 40, 128) | 147584 | activation_276[0][0]                         |
| batch_normalization_115 (BatchNormalization)         | (None, 40, 40, 128) | 512    | conv2d_151[0][0]                             |
| activation_277 (Activation)                          | (None, 40, 40, 128) | 0      | batch_normalization_115[0][0]                |
| global_average_pooling2d_81 (GlobalAveragePooling2D) | (None, 128)         | 0      | activation_277[0][0]                         |
| dense_81 (Dense)                                     | (None, 128)         | 16512  | global_average_pooling2d_81[0][0]            |
| activation_278 (Activation)                          | (None, 128)         | 0      | dense_81[0][0]                               |
| activation_279 (Activation)                          | (None, 128)         | 0      | activation_278[0][0]                         |
| multiply_81 (Multiply)                               | (None, 40, 40, 128) | 0      | activation_277[0][0]<br>activation_279[0][0] |
| max_pooling2d_27 (MaxPooling2D)                      | (None, 20, 20, 128) | 0      | multiply_81[0][0]                            |
| dropout_51 (Dropout)                                 | (None, 20, 20, 128) | 0      | max_pooling2d_27[0][0]                       |
| conv2d_152 (Conv2D)                                  | (None, 20, 20, 128) | 147584 | dropout_51[0][0]                             |
| global_average_pooling2d_82 (GlobalAveragePooling2D) | (None, 128)         | 0      | conv2d_152[0][0]                             |
| dense_82 (Dense)                                     | (None, 128)         | 16512  | global_average_pooling2d_82[0][0]            |
| activation_280 (Activation)                          | (None, 128)         | 0      | dense_82[0][0]                               |
| activation_281 (Activation)                          | (None, 128)         | 0      | activation_280[0][0]                         |
| multiply_82 (Multiply)                               | (None, 20, 20, 128) | 0      | conv2d_152[0][0]<br>activation_281[0][0]     |
| conv2d_153 (Conv2D)                                  | (None, 20, 20, 64)  | 73792  | multiply_82[0][0]                            |
| global_average_pooling2d_83 (GlobalAveragePooling2D) | (None, 64)          | 0      | conv2d_153[0][0]                             |
| dense_83 (Dense)                                     | (None, 64)          | 4160   | global_average_pooling2d_83[0][0]            |
| activation_282 (Activation)                          | (None, 64)          | 0      | dense_83[0][0]                               |
| activation_283 (Activation)                          | (None, 64)          | 0      | activation_282[0][0]                         |
| multiply_83 (Multiply)                               | (None, 20, 20, 64)  | 0      | conv2d_153[0][0]<br>activation_283[0][0]     |
| conv2d_154 (Conv2D)                                  | (None, 20, 20, 32)  | 18464  | multiply_83[0][0]                            |

|                                                      |                     |        |                                              |
|------------------------------------------------------|---------------------|--------|----------------------------------------------|
| global_average_pooling2d_84 (GlobalAveragePooling2D) | (None, 32)          | 0      | conv2d_154[0][0]                             |
| dense_84 (Dense)                                     | (None, 32)          | 1056   | global_average_pooling2d_84[0][0]            |
| activation_284 (Activation)                          | (None, 32)          | 0      | dense_84[0][0]                               |
| activation_285 (Activation)                          | (None, 32)          | 0      | activation_284[0][0]                         |
| multiply_84 (Multiply)                               | (None, 20, 20, 32)  | 0      | conv2d_154[0][0]<br>activation_285[0][0]     |
| conv2d_155 (Conv2D)                                  | (None, 20, 20, 16)  | 4624   | multiply_84[0][0]                            |
| global_average_pooling2d_85 (GlobalAveragePooling2D) | (None, 16)          | 0      | conv2d_155[0][0]                             |
| dense_85 (Dense)                                     | (None, 16)          | 272    | global_average_pooling2d_85[0][0]            |
| activation_286 (Activation)                          | (None, 16)          | 0      | dense_85[0][0]                               |
| activation_287 (Activation)                          | (None, 16)          | 0      | activation_286[0][0]                         |
| multiply_85 (Multiply)                               | (None, 20, 20, 16)  | 0      | conv2d_155[0][0]<br>activation_287[0][0]     |
| conv2d_156 (Conv2D)                                  | (None, 20, 20, 128) | 18560  | multiply_85[0][0]                            |
| add_30 (Add)                                         | (None, 20, 20, 128) | 0      | conv2d_156[0][0]<br>conv2d_152[0][0]         |
| conv2d_157 (Conv2D)                                  | (None, 20, 20, 128) | 147584 | add_30[0][0]                                 |
| batch_normalization_116 (BatchNormalization)         | (None, 20, 20, 128) | 512    | conv2d_157[0][0]                             |
| activation_288 (Activation)                          | (None, 20, 20, 128) | 0      | batch_normalization_116[0][0]                |
| conv2d_158 (Conv2D)                                  | (None, 20, 20, 128) | 147584 | activation_288[0][0]                         |
| batch_normalization_117 (BatchNormalization)         | (None, 20, 20, 128) | 512    | conv2d_158[0][0]                             |
| activation_289 (Activation)                          | (None, 20, 20, 128) | 0      | batch_normalization_117[0][0]                |
| global_average_pooling2d_86 (GlobalAveragePooling2D) | (None, 128)         | 0      | activation_289[0][0]                         |
| dense_86 (Dense)                                     | (None, 128)         | 16512  | global_average_pooling2d_86[0][0]            |
| activation_290 (Activation)                          | (None, 128)         | 0      | dense_86[0][0]                               |
| activation_291 (Activation)                          | (None, 128)         | 0      | activation_290[0][0]                         |
| multiply_86 (Multiply)                               | (None, 20, 20, 128) | 0      | activation_289[0][0]<br>activation_291[0][0] |
| up_sampling2d_24 (UpSampling2D)                      | (None, 40, 40, 128) | 0      | multiply_86[0][0]                            |
| add_31 (Add)                                         | (None, 40, 40, 128) | 0      | up_sampling2d_24[0][0]<br>multiply_81[0][0]  |
| dropout_52 (Dropout)                                 | (None, 40, 40, 128) | 0      | add_31[0][0]                                 |
| conv2d_159 (Conv2D)                                  | (None, 40, 40, 128) | 147584 | dropout_52[0][0]                             |
| batch_normalization_118 (BatchNormalization)         | (None, 40, 40, 128) | 512    | conv2d_159[0][0]                             |
| activation_292 (Activation)                          | (None, 40, 40, 128) | 0      | batch_normalization_118[0][0]                |

|                                                      |                       |        |                                              |
|------------------------------------------------------|-----------------------|--------|----------------------------------------------|
| conv2d_160 (Conv2D)                                  | (None, 40, 40, 128)   | 147584 | activation_292[0][0]                         |
| batch_normalization_119 (BatchNormalization)         | (None, 40, 40, 128)   | 512    | conv2d_160[0][0]                             |
| activation_293 (Activation)                          | (None, 40, 40, 128)   | 0      | batch_normalization_119[0][0]                |
| global_average_pooling2d_87 (GlobalAveragePooling2D) | (None, 128)           | 0      | activation_293[0][0]                         |
| dense_87 (Dense)                                     | (None, 128)           | 16512  | global_average_pooling2d_87[0][0]            |
| activation_294 (Activation)                          | (None, 128)           | 0      | dense_87[0][0]                               |
| activation_295 (Activation)                          | (None, 128)           | 0      | activation_294[0][0]                         |
| multiply_87 (Multiply)                               | (None, 40, 40, 128)   | 0      | activation_293[0][0]<br>activation_295[0][0] |
| up_sampling2d_25 (UpSampling2D)                      | (None, 80, 80, 128)   | 0      | multiply_87[0][0]                            |
| add_32 (Add)                                         | (None, 80, 80, 128)   | 0      | up_sampling2d_25[0][0]<br>multiply_80[0][0]  |
| dropout_53 (Dropout)                                 | (None, 80, 80, 128)   | 0      | add_32[0][0]                                 |
| conv2d_161 (Conv2D)                                  | (None, 80, 80, 128)   | 147584 | dropout_53[0][0]                             |
| batch_normalization_120 (BatchNormalization)         | (None, 80, 80, 128)   | 512    | conv2d_161[0][0]                             |
| activation_296 (Activation)                          | (None, 80, 80, 128)   | 0      | batch_normalization_120[0][0]                |
| conv2d_162 (Conv2D)                                  | (None, 80, 80, 128)   | 147584 | activation_296[0][0]                         |
| batch_normalization_121 (BatchNormalization)         | (None, 80, 80, 128)   | 512    | conv2d_162[0][0]                             |
| activation_297 (Activation)                          | (None, 80, 80, 128)   | 0      | batch_normalization_121[0][0]                |
| global_average_pooling2d_88 (GlobalAveragePooling2D) | (None, 128)           | 0      | activation_297[0][0]                         |
| dense_88 (Dense)                                     | (None, 128)           | 16512  | global_average_pooling2d_88[0][0]            |
| activation_298 (Activation)                          | (None, 128)           | 0      | dense_88[0][0]                               |
| activation_299 (Activation)                          | (None, 128)           | 0      | activation_298[0][0]                         |
| multiply_88 (Multiply)                               | (None, 80, 80, 128)   | 0      | activation_297[0][0]<br>activation_299[0][0] |
| up_sampling2d_26 (UpSampling2D)                      | (None, 160, 160, 128) | 0      | multiply_88[0][0]                            |
| add_33 (Add)                                         | (None, 160, 160, 128) | 0      | up_sampling2d_26[0][0]<br>multiply_79[0][0]  |
| dropout_54 (Dropout)                                 | (None, 160, 160, 128) | 0      | add_33[0][0]                                 |
| conv2d_163 (Conv2D)                                  | (None, 160, 160, 128) | 147584 | dropout_54[0][0]                             |
| batch_normalization_122 (BatchNormalization)         | (None, 160, 160, 128) | 512    | conv2d_163[0][0]                             |
| activation_300 (Activation)                          | (None, 160, 160, 128) | 0      | batch_normalization_122[0][0]                |
| conv2d_164 (Conv2D)                                  | (None, 160, 160, 128) | 147584 | activation_300[0][0]                         |
| batch_normalization_123 (BatchNormalization)         | (None, 160, 160, 128) | 512    | conv2d_164[0][0]                             |
| activation_301 (Activation)                          | (None, 160, 160, 128) | 0      | batch_normalization_123[0][0]                |

|                                                      |                       |        |                                              |
|------------------------------------------------------|-----------------------|--------|----------------------------------------------|
| global_average_pooling2d_89 (GlobalAveragePooling2D) | (None, 128)           | 0      | activation_301[0][0]                         |
| dense_89 (Dense)                                     | (None, 128)           | 16512  | global_average_pooling2d_89[0][0]            |
| activation_302 (Activation)                          | (None, 128)           | 0      | dense_89[0][0]                               |
| activation_303 (Activation)                          | (None, 128)           | 0      | activation_302[0][0]                         |
| multiply_89 (Multiply)                               | (None, 160, 160, 128) | 0      | activation_301[0][0]<br>activation_303[0][0] |
| up_sampling2d_27 (UpSampling2D)                      | (None, 320, 320, 128) | 0      | multiply_89[0][0]                            |
| add_34 (Add)                                         | (None, 320, 320, 128) | 0      | up_sampling2d_27[0][0]<br>multiply_78[0][0]  |
| dropout_55 (Dropout)                                 | (None, 320, 320, 128) | 0      | add_34[0][0]                                 |
| conv2d_165 (Conv2D)                                  | (None, 320, 320, 128) | 147584 | dropout_55[0][0]                             |
| batch_normalization_124 (BatchNormalization)         | (None, 320, 320, 128) | 512    | conv2d_165[0][0]                             |
| activation_304 (Activation)                          | (None, 320, 320, 128) | 0      | batch_normalization_124[0][0]                |
| conv2d_166 (Conv2D)                                  | (None, 320, 320, 128) | 147584 | activation_304[0][0]                         |
| batch_normalization_125 (BatchNormalization)         | (None, 320, 320, 128) | 512    | conv2d_166[0][0]                             |
| activation_305 (Activation)                          | (None, 320, 320, 128) | 0      | batch_normalization_125[0][0]                |
| global_average_pooling2d_90 (GlobalAveragePooling2D) | (None, 128)           | 0      | activation_305[0][0]                         |
| dense_90 (Dense)                                     | (None, 128)           | 16512  | global_average_pooling2d_90[0][0]            |
| activation_306 (Activation)                          | (None, 128)           | 0      | dense_90[0][0]                               |
| activation_307 (Activation)                          | (None, 128)           | 0      | activation_306[0][0]                         |
| multiply_90 (Multiply)                               | (None, 320, 320, 128) | 0      | activation_305[0][0]<br>activation_307[0][0] |
| conv2d_167 (Conv2D)                                  | (None, 320, 320, 3)   | 3459   | multiply_90[0][0]                            |

Total params: 2,958,819  
 Trainable params: 2,954,211  
 Non-trainable params: 4,608

**Attached video file:** The video file, 'LWBNA\_Unet\_FAZ\_predicted\_fps\_with\_i9\_cpu\_2080Ti\_gpu.avi' shows the automatic segmentation of FAZ area (red color) for the testing dataset.

**Attached PNG file:** The, 'Model\_LWBNA\_Unet.png' is the plot of our lightweight model generated by the Tensorflow(keras).
